# Supplementary material for: The skin regeneration potential of a pro-angiogenic secretome from human skin-derived multipotent stromal cells
Source: PubMed Central journal article supplement — J Tissue Eng. 2019 Mar 12;10:2041731419833391. doi: 10.1177/2041731419833391 (PMC6415469; doi:10.1177/2041731419833391), 2019-03-12
Supplement: Supplementary_figures.pdf [file Supplementary_figures.pdf]

## **Supplementary Material**

### **The skin regeneration potential of a pro-angiogenic secretome from human skin-derived multipotent stromal cells**

Anny Waloski Robert<sup>1</sup>, Felipe Azevedo Gomes<sup>2</sup>, Michele Patrícia Rode<sup>3</sup>, Maiara Marques da Silva<sup>2</sup>, Maria Beatriz da Rocha Veleirinho<sup>3</sup>, Marcelo Maraschin<sup>5</sup>, Leila Hayashi<sup>5</sup>, Giordano Wosgrau Calloni<sup>2,\*</sup>, Marco Augusto Stimamiglio<sup>1,\*</sup>

A

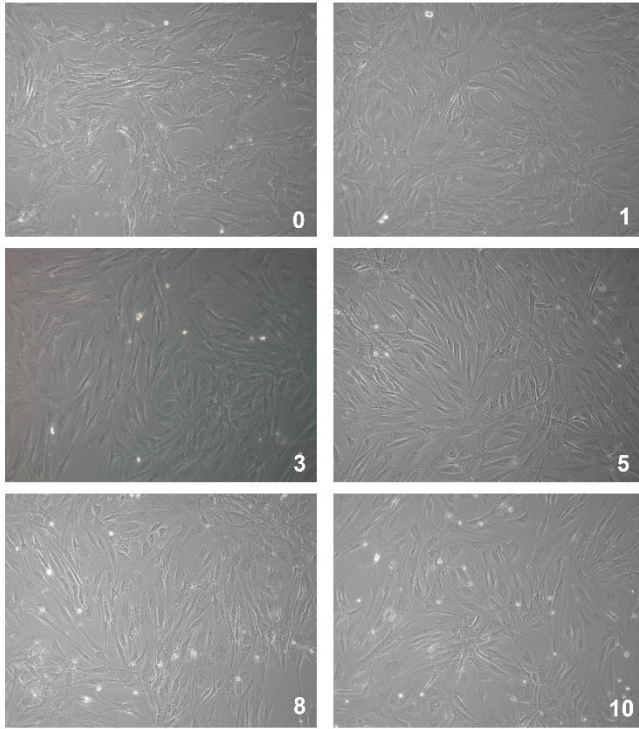

B

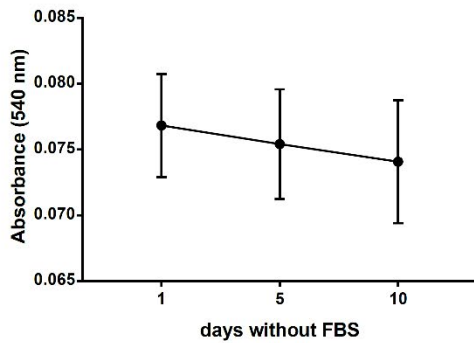

C

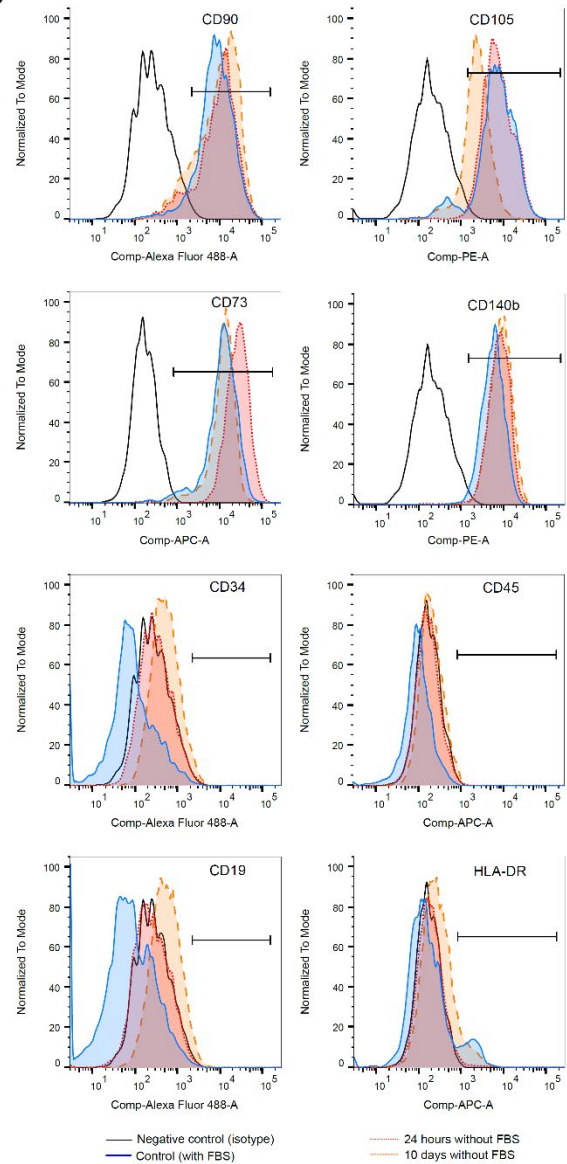

**Supplementary Figure S1.** Morphologic and phenotypic analysis of SD-MSC during culture for CM collection (10 days in DMEM without FBS). A) Representative images of SD-MSC cultures without FBS in different days (0, 1, 3, 5, 8 and 10). B) Graph showing absorbance measuring of neutral red uptake (protocol adapted from previously described<sup>1</sup>) by SD-MSC after 1, 5 and 10 days without FBS showing no alteration in cell viability. C) Immunophenotypic characterization of SD-MSC (as previously performed<sup>2</sup>) in normal culture conditions (DMEM 10% SFB, blue line) and after 24 hours (red dotted line) and 10 days (orange traced line) in CM-collection culture condition (DMEM without FBS).

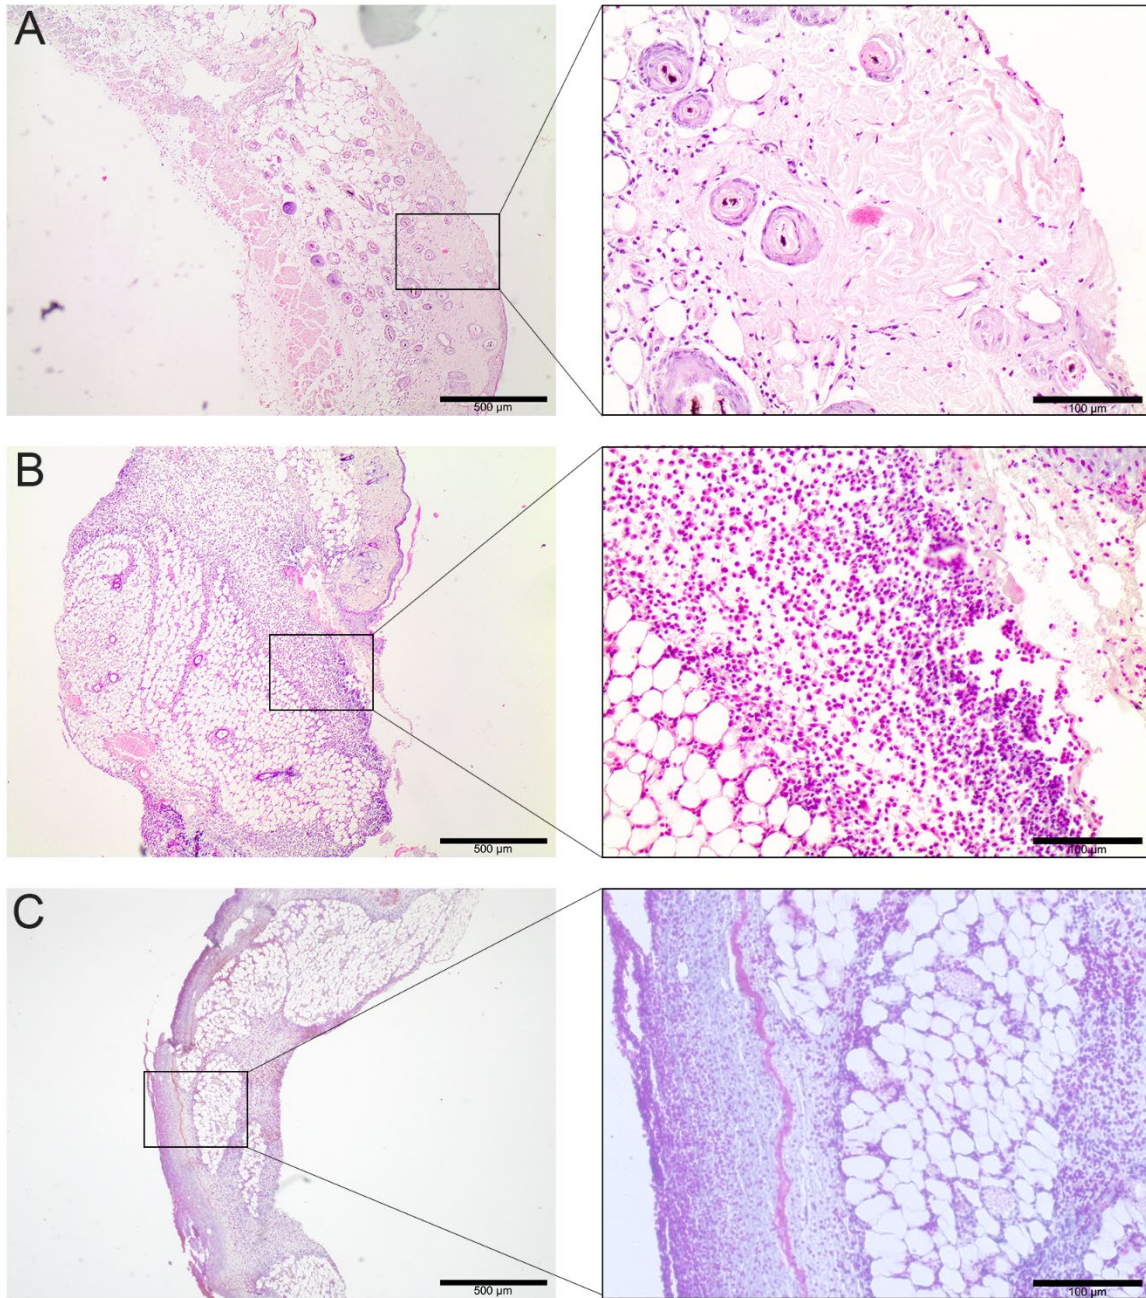

**Supplementary Figure S2.** Histomorphological analysis of the inflammatory infiltrates estimated by leukocyte density evaluation during skin healing in mice. Illustrative H&E-stained images classifying leukocyte density as (A) low, (B) moderate or (C) high. The images on the left are at 4X magnification, and the images on the right are at 20X magnification.

A

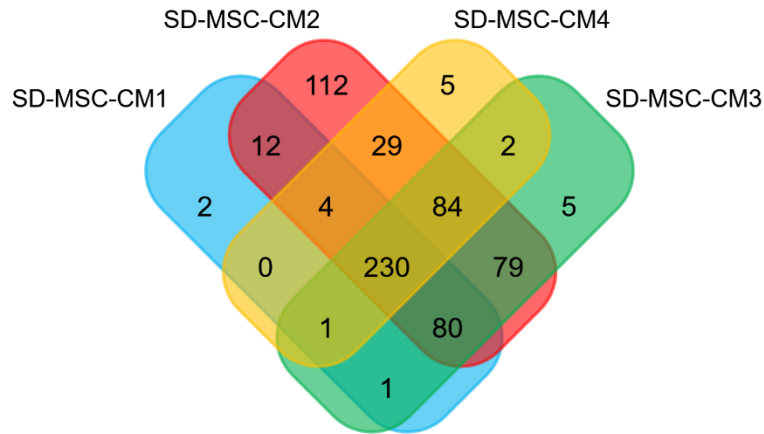

B

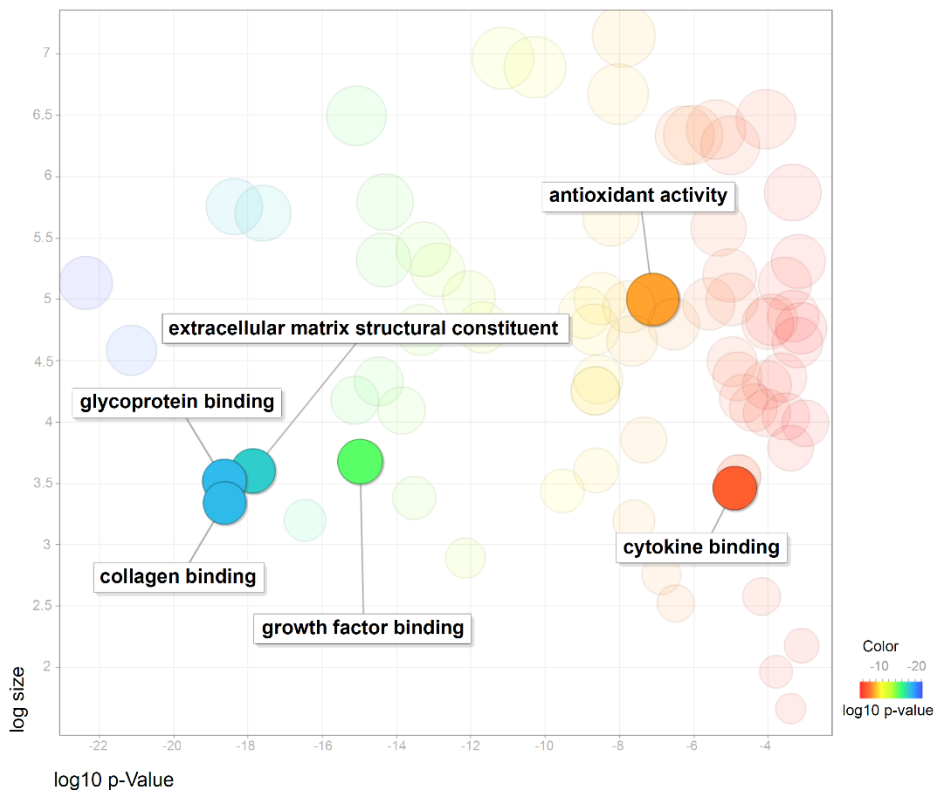

**Supplementary Figure S3.** Proteomic profile of the SD-MSC secretome. (A) Venn diagram showing the number of proteins identified in each of the four samples. Note that most of the proteins appear in at least 3 samples. (B) Graph representing most relevant GO terms related to molecular functions.

## Supplementary references

1. Abud APR, Zych J, Reus TL, et al. The use of human adipose-derived stem cells based cytotoxicity assay for acute toxicity test. *Regul Toxicol Pharmacol* 2015; 73: 992–998.
2. Jeremias T da S, Machado RG, Visoni SBC, et al. Dermal Substitutes Support the Growth of Human Skin-Derived Mesenchymal Stromal Cells: Potential Tool for Skin Regeneration. *PLoS One* 2014; 9: e89542.
